# Supplementary material
Source: Research Square preprint supplement (doi:10.21203/rs.3.rs-9785671/v1)
Supplement: Supplementary file 1 [file 0b2357444bce7b6166914b8c.xlsx]

## Sheet: Table S1
Table S1 LEfSe results of differentially enriched microbial genera between the parasitism-associated group (T+J) and unparasitized stems (W) across the three host plant systems (LDA > 3.0, p < 0.05).
A. Bacterial biomarkers (T+J vs W)
Schefflera heptaphylla						Pueraria montana						Humulus scandens
genus	log_value	group	LDA_score	p_valued		genus	log_value	group	LDA_score	p_valued		genus	log_value	group	LDA_score	p_valued
Allorhizobium_Neorhizobium_Pararhizobium_Rhizobium	5.04592	EZCT+EZCJ	4.73472	0.00657841		Sphingomonas	5.68248	PLGW	5.27599	0.00657841		Methylobacterium_Methylorubrum	5.4223	LCHW	4.92914	0.00657841
Halomonas	4.94984	EZCW	4.59272	0.00657841		Candidatus_Phytoplasma	5.07653	PLGT+PLGJ	4.87473	0.00567039		Pseudomonas	4.84643	LCHT+LCHJ	4.47941	0.00657841
Aureimonas	5.01284	EZCT+EZCJ	4.50751	0.00657841		Allorhizobium_Neorhizobium_Pararhizobium_Rhizobium	4.96805	PLGT+PLGJ	4.539	0.0415401		Massilia	4.62437	LCHT+LCHJ	4.3029	0.00648433
Massilia	4.81806	EZCT+EZCJ	4.44965	0.00657841		Stenotrophomonas	4.72594	PLGT+PLGJ	4.37975	0.00657841		Xanthomonas	4.5907	LCHT+LCHJ	4.27957	0.00620645
Pseudomonas	4.76023	EZCT+EZCJ	4.33946	0.010846		Massilia	4.62905	PLGT+PLGJ	4.26417	0.00657841		Allorhizobium_Neorhizobium_Pararhizobium_Rhizobium	4.41938	LCHT+LCHJ	4.05521	0.00657841
Gluconacetobacter	4.58283	EZCW	4.30831	0.00122288		Aureimonas	4.65128	PLGT+PLGJ	4.09873	0.0415401		Hymenobacter	4.44381	LCHW	3.97755	0.00657841
Polaromonas	4.58068	EZCT+EZCJ	4.18165	0.00657841		Sphingobacterium	4.24965	PLGT+PLGJ	3.94158	0.00620645		Chryseobacterium	4.25307	LCHT+LCHJ	3.9269	0.00657841
Pantoea	4.4625	EZCT+EZCJ	4.17569	0.00657841		Hymenobacter	4.34161	PLGW	3.93339	0.00657841		Stenotrophomonas	4.22654	LCHT+LCHJ	3.91531	0.0136802
Buchnera	4.42714	EZCT+EZCJ	4.13796	0.00648433		Polaromonas	4.22901	PLGT+PLGJ	3.92529	0.00648433		Xylophilus	4.04858	LCHT+LCHJ	3.74661	0.00620645
Kosakonia	4.46158	EZCT+EZCJ	4.13584	0.00567039		Verticiella	4.13182	PLGT+PLGJ	3.81938	0.00620645		Klenkia	4.09642	LCHW	3.73906	0.00648433
Xanthomonas	4.48284	EZCT+EZCJ	4.12146	0.0174171		Luteimonas	4.26322	PLGT+PLGJ	3.793	0.0272484		Polaromonas	3.90133	LCHT+LCHJ	3.59422	0.00620645
Lachnoclostridium	4.39758	EZCW	4.06752	0.010846		Pedobacter	4.02964	PLGT+PLGJ	3.65223	0.00657841		Mucilaginibacter	3.9942	LCHT+LCHJ	3.59293	0.00657841
Nocardioides	4.25065	EZCW	3.91943	0.00657841		Chryseobacterium	4.08497	PLGW	3.64272	0.00657841		Herbaspirillum	3.89976	LCHT+LCHJ	3.58615	0.00620645
Sphingobacterium	4.15755	EZCT+EZCJ	3.91603	0.0136802		Xanthomonas	3.9616	PLGT+PLGJ	3.63529	0.00567039		Friedmanniella	3.67497	LCHW	3.45647	0.00567039
Bradyrhizobium	4.2942	EZCW	3.89746	0.00657841		Ralstonia	3.97909	PLGW	3.53225	0.0272484		Amnibacterium	3.4999	LCHW	3.24397	0.00244326
Delftia	4.22256	EZCW	3.88173	0.00657841		Falsirhodobacter	3.8481	PLGT+PLGJ	3.53064	0.00657841		Rhodoferax	3.40142	LCHT+LCHJ	3.21686	0.00620645
Xylophilus	4.15213	EZCT+EZCJ	3.86733	0.00567039		Devosia	3.996	PLGT+PLGJ	3.50582	0.010846		Kosakonia	3.44154	LCHW	3.19343	0.00244326
Blautia	4.20793	EZCW	3.83466	0.00657841		Pseudorhodoferax	3.82119	PLGW	3.47277	0.00648433		Jatrophihabitans	3.39877	LCHW	3.19265	0.00449879
Ralstonia	4.23155	EZCW	3.8331	0.00657841		Siphonobacter	3.69785	PLGW	3.46643	0.00620645		Marmoricola	3.49131	LCHW	3.18727	0.00483579
Romboutsia	4.119	EZCW	3.80734	0.00620645		Halomonas	4.03672	PLGW	3.452	0.0415401		Bacillus	3.51451	LCHT+LCHJ	3.16552	0.0174171
Bacteroides	4.17058	EZCW	3.77984	0.00657841		Flavisolibacter	3.73197	PLGW	3.43071	0.00648433		Nocardioides	3.57103	LCHW	3.1261	0.00657841
Pseudonocardia	4.06342	EZCW	3.77089	0.0415401		Flavobacterium	3.71965	PLGT+PLGJ	3.37338	0.00657841		Frigoribacterium	3.37449	LCHT+LCHJ	3.10775	0.00567039
Variovorax	4.22643	EZCT+EZCJ	3.70878	0.0269798		Agaricicola	2.35372	PLGT+PLGJ	3.34959	0.0295881		Candidatus_Uzinura	3.15619	LCHW	3.09945	0.00483579
Friedmanniella	4.0315	EZCW	3.67945	0.00657841		Sphaerotilus	3.61603	PLGW	3.33076	0.00483579		Acidiphilium	3.2946	LCHW	3.08991	0.00746875
Novosphingobium	4.02065	EZCW	3.67913	0.00657841		Altererythrobacter	3.68366	PLGW	3.30026	0.00648433		Candidatus_Trichorickettsia	2.08008	LCHW	3.05195	0.00746875
Alistipes	3.97289	EZCW	3.6379	0.00620645		Lachnoclostridium	3.66787	PLGW	3.2675	0.00657841		Melittangium	2.39853	LCHT+LCHJ	3.04364	0.0136802
Curtobacterium	3.90285	EZCT+EZCJ	3.56463	0.00648433		Blautia	3.61943	PLGW	3.23616	0.00657841		Deinococcus	2.83849	LCHT+LCHJ	3.0428	0.00657841
Acidothermus	3.43574	EZCW	3.54577	0.0367139		Ideonella	3.50458	PLGW	3.21639	0.00620645		Modestobacter	2.60405	LCHW	3.03119	0.0201218
Escherichia_Shigella	3.87139	EZCW	3.53683	0.00657841		Erwinia	3.13257	PLGT+PLGJ	3.18204	0.0295881		Bdellovibrio	3.8102	LCHW	3.03016	0.0272484
Staphylococcus	3.85614	EZCW	3.52425	0.00657841		Methylibium	3.43135	PLGW	3.1283	0.00122288
Nitriliruptor	3.81507	EZCW	3.46852	0.00648433		Aurantimonas	3.35813	PLGT+PLGJ	3.09587	0.00620645
Rubellimicrobium	3.7969	EZCW	3.43387	0.00648433		Peredibacter	2.32888	PLGT+PLGJ	3.09281	0.0136802
Candidatus_Solibacter	3.69724	EZCW	3.39703	0.00372272		Ferruginibacter	2.2216	PLGW	3.08435	0.0338397
Quadrisphaera	3.91458	EZCT+EZCJ	3.38739	0.0415401		Variovorax	3.68612	PLGT+PLGJ	3.07497	0.0415401
Acinetobacter	3.69718	EZCW	3.38409	0.0166391		Janthinobacterium	3.36117	PLGT+PLGJ	3.07397	0.0136802
Candidatus_Phytoplasma	3.29896	EZCW	3.35445	0.0367139		Rosenbergiella	3.3877	PLGW	3.0617	0.00567039
Dubosiella	3.66232	EZCW	3.3493	0.00620645		Aliihoeflea	3.16982	PLGT+PLGJ	3.0467	0.00567039
Solirubrobacter	3.75107	EZCW	3.33577	0.00657841		Ketogulonicigenium	2.65678	PLGT+PLGJ	3.04552	0.0136802
Ensifer	3.60705	EZCW	3.31077	0.00483579		Oligoflexus	2.64351	PLGT+PLGJ	3.02251	0.00567039
Ramlibacter	3.58119	EZCT+EZCJ	3.29463	0.0195942		Pigmentiphaga	3.03384	PLGT+PLGJ	3.01373	0.0261791
Rhodoferax	3.52403	EZCT+EZCJ	3.27069	0.00567039
Vulcaniibacterium	3.3545	EZCW	3.26517	0.0367139
Paucibacter	3.52735	EZCW	3.23636	0.00657841
Rhodoplanes	2.38394	EZCT+EZCJ	3.22562	0.0295881
Mucilaginibacter	3.46026	EZCT+EZCJ	3.21004	0.00648433
Reyranella	3.55723	EZCW	3.20568	0.0107079
Paracoccus	3.53913	EZCW	3.19532	0.0172213
Marmoricola	3.48425	EZCW	3.1889	0.0166391
Acidovorax	3.54433	EZCT+EZCJ	3.17023	0.0166391
Saccharibacillus	2.88006	EZCT+EZCJ	3.16264	0.00567039
Povalibacter	2.48938	EZCT+EZCJ	3.07775	0.0295881
Rickettsia	3.38972	EZCW	3.07628	0.0201218
Caedibacter	2.26202	EZCT+EZCJ	3.06636	0.0295881
Lactobacillus	3.34239	EZCW	3.06426	0.0155003
Desulfuromonas	2.9588	EZCW	3.04946	0.0367139
Acidiphilium	3.37304	EZCW	3.04641	0.00653902
Tianweitania	3.07537	EZCW	3.03416	0.0367139
Enhydrobacter	3.32592	EZCW	3.02837	0.00567039
Williamsia	3.25038	EZCW	3.01518	0.00122288
B. Fungal biomarkers (T+J vs W)
Schefflera heptaphylla						Pueraria montana						Humulus scandens
genus	log_value	group	LDA_score	p_valued		genus	log_value	group	LDA_score	p_valued		genus	log_value	group	LDA_score	p_valued
Uwebraunia	5.72634	EZCW	5.26346	0.00657841		Pseudoascochyta	5.10253	PLGW	4.81719	0.00620645		Pseudoascochyta	5.47524	LCHW	5.17284	0.00648433
Hyweljonesia	5.39956	EZCW	5.07126	0.00657841		Cladosporium	5.32091	PLGT+PLGJ	4.80931	0.0272484		Hannaella	5.12147	LCHT+LCHJ	4.76126	0.0272484
Colletotrichum	5.15227	EZCT+EZCJ	4.80755	0.00657841		Phaeosphaeria	5.14584	PLGW	4.79933	0.00657841		Microdochium	4.87813	LCHW	4.55458	0.00657841
Neodidymella	4.99427	EZCT+EZCJ	4.66977	0.00657841		Acremonium	4.85331	PLGT+PLGJ	4.60211	0.00620645		Cercospora	4.93507	LCHT+LCHJ	4.55083	0.0415401
Cladosporium	5.17474	EZCT+EZCJ	4.62389	0.00657841		Periconia	4.88625	PLGT+PLGJ	4.53357	0.00648433		Cladosporium	5.23239	LCHT+LCHJ	4.49145	0.0272484
Alternaria	4.808	EZCT+EZCJ	4.47453	0.00657841		Elsinoe	4.80233	PLGT+PLGJ	4.53027	0.00567039		Neodidymella	4.85046	LCHT+LCHJ	4.49138	0.0415401
Pseudopeyronellaea	4.66761	EZCT+EZCJ	4.35662	0.00657841		Parafenestella	4.62106	PLGW	4.31088	0.00372272		Fusarium	4.83679	LCHT+LCHJ	4.40972	0.0272484
Fusarium	4.60855	EZCT+EZCJ	4.31691	0.00657841		Didymocyrtis	4.52151	PLGW	4.25268	0.00620645		Neosetophoma	4.38051	LCHT+LCHJ	4.01037	0.0174171
Cercospora	4.44261	EZCT+EZCJ	3.97877	0.00657841		Vishniacozyma	4.58202	PLGT+PLGJ	4.24096	0.00648433		Ascochyta	4.28947	LCHT+LCHJ	3.98259	0.0195942
Dioszegia	4.33463	EZCT+EZCJ	3.85685	0.0272484		Rhodotorula	3.52296	PLGW	3.99121	0.0367139		Curvularia	4.19181	LCHT+LCHJ	3.85686	0.0174171
Pseudocercospora	4.1751	EZCT+EZCJ	3.82435	0.00657841		Epicoccum	4.24987	PLGT+PLGJ	3.94993	0.00620645		Aaosphaeria	4.07773	LCHW	3.78558	0.00372272
Strelitziana	4.16483	EZCT+EZCJ	3.81009	0.00657841		Pseudorobillarda	4.19074	PLGW	3.88567	0.00122288		Monocillium	2.31065	LCHW	3.52935	0.00746875
Hannaella	4.29635	EZCT+EZCJ	3.80534	0.00657841		Colletotrichum	4.17717	PLGT+PLGJ	3.8797	0.00567039		Erythrobasidium	3.87799	LCHT+LCHJ	3.48715	0.0401209
Stagonosporopsis	4.07678	EZCT+EZCJ	3.75683	0.00657841		Pyrenochaetopsis	4.12591	PLGW	3.84996	0.0102989		Devriesia	3.61863	LCHW	3.33887	0.00746875
Filobasidium	3.99844	EZCT+EZCJ	3.70024	0.00620645		Stagonospora	4.03664	PLGW	3.83628	0.00746875		Parafenestella	3.58858	LCHW	3.29194	0.0220537
Epicoleosporium	3.99376	EZCT+EZCJ	3.62507	0.0174171		Saitozyma	3.9876	PLGW	3.78039	0.00244326		Pseudorobillarda	3.56663	LCHW	3.29124	0.00122288
Neosetophoma	4.08858	EZCT+EZCJ	3.62272	0.0174171		Setophaeosphaeria	4.06852	PLGT+PLGJ	3.76079	0.00648433		Rhizoctonia	1.65618	LCHW	3.23798	0.0367139
Phaeosphaeria	4.13764	EZCT+EZCJ	3.54605	0.0174171		Leptospora	4.10813	PLGT+PLGJ	3.75004	0.00657841		Dinemasporium	3.50086	LCHW	3.23133	0.0367139
Setophaeosphaeria	3.82506	EZCT+EZCJ	3.47554	0.00657841		Microbotryozyma	4.00333	PLGW	3.71193	0.00746875		Dioszegia	3.4936	LCHT+LCHJ	3.13664	0.0172213
Sporobolomyces	3.74353	EZCW	3.38585	0.00372272		Acaromyces	2.01747	PLGT+PLGJ	3.7049	0.0295881		Pseudozyma	1.8579	LCHT+LCHJ	3.13273	0.0295881
Dissoconium	3.73997	EZCW	3.37716	0.00648433		Paraconiothyrium	3.93428	PLGW	3.6832	0.00372272		Russula	3.40177	LCHW	3.10731	0.0338397
Trichomerium	1.32757	EZCW	3.36729	0.0367139		Mycoleptodiscus	3.91825	PLGW	3.6448	0.00746875		Eleutherascus	2.35056	LCHW	3.1004	0.0367139
Epicoccum	3.78051	EZCT+EZCJ	3.36651	0.00657841		Paramyrothecium	3.68884	PLGW	3.63613	0.00746875		Sporobolomyces	3.39804	LCHT+LCHJ	3.05866	0.00620645
Elsinoe	3.66556	EZCT+EZCJ	3.35833	0.0107079		Limonomyces	3.94962	PLGW	3.6273	0.00122288		Moesziomyces	1.82144	LCHT+LCHJ	3.01348	0.0295881
Plectosphaerella	3.78845	EZCT+EZCJ	3.32094	0.010846		Gibellulopsis	3.91403	PLGT+PLGJ	3.61161	0.00648433		Leptospora	3.35953	LCHT+LCHJ	3.0046	0.0334416
Lectera	3.52313	EZCT+EZCJ	3.20426	0.00620645		Zasmidium	4.02291	PLGT+PLGJ	3.60477	0.0295881
Leptospora	3.54409	EZCT+EZCJ	3.19176	0.00657841		Dinemasporium	3.02429	PLGW	3.54213	0.00746875
Gibellulopsis	3.40439	EZCT+EZCJ	3.18608	0.00620645		Ascochyta	3.76103	PLGT+PLGJ	3.47379	0.0295881
Cryptococcus	3.45221	EZCT+EZCJ	3.17926	0.0166391		Lectera	2.23407	PLGT+PLGJ	3.46508	0.0295881
Neomycosphaerella	3.06592	EZCW	3.15417	0.0201218		Albifimbria	3.35887	PLGW	3.46384	0.00746875
Microdochium	2.66132	EZCW	3.13591	0.00244326		Microdochium	3.69955	PLGW	3.45804	0.00244326
Mycosphaerella	3.31995	EZCW	3.08085	0.00657841		Trichothecium	3.70886	PLGT+PLGJ	3.44003	0.00567039
Zygophiala	3.07581	EZCW	3.06524	0.00825001		Uwebraunia	3.71846	PLGT+PLGJ	3.41404	0.0102989
Paraphoma	3.28439	EZCT+EZCJ	3.06349	0.010846		Ramularia	2.48643	PLGT+PLGJ	3.40649	0.0295881
						Edenia	3.49202	PLGW	3.37143	0.00372272
						Paraphoma	3.68292	PLGT+PLGJ	3.36762	0.00657841
						Dioszegia	3.55351	PLGT+PLGJ	3.309	0.00567039
						Dendryphiella	3.4673	PLGT+PLGJ	3.30224	0.0136802
						Neodidymelliopsis	3.74223	PLGT+PLGJ	3.26694	0.0415401
						Pseudocercospora	3.5004	PLGT+PLGJ	3.26171	0.00567039
						Scleroramularia	2.65743	PLGT+PLGJ	3.25554	0.0136802
						Meira	3.20008	PLGT+PLGJ	3.24362	0.00567039
						Gonatophragmium	3.3489	PLGT+PLGJ	3.22452	0.0295881
						Neodevriesia	2.98514	PLGT+PLGJ	3.19047	0.0136802
						Schizothyrium	3.49084	PLGT+PLGJ	3.17457	0.00567039
						Collarispora	3.22268	PLGT+PLGJ	3.17025	0.00567039
						Epicoleosporium	3.04387	PLGT+PLGJ	3.16951	0.0136802
						Fusariella	3.3664	PLGT+PLGJ	3.16857	0.0136802
						Roussoella	2.89483	PLGT+PLGJ	3.12907	0.0136802
						Buckleyzyma	3.14058	PLGT+PLGJ	3.10911	0.00567039
						Golubevia	3.3823	PLGT+PLGJ	3.10417	0.0401209
						Teratoramularia	2.82078	PLGT+PLGJ	3.07914	0.0136802
						Dendryphion	2.94604	PLGT+PLGJ	3.07812	0.0295881
						Rhodosporidiobolus	3.02872	PLGT+PLGJ	3.07576	0.0295881
						Helminthosporium	3.23859	PLGT+PLGJ	3.00179	0.0136802

## Sheet: Table S2
Table S2 LEfSe results of differentially enriched microbial genera among C. chinensis (T), parasitized stems (J), and unparasitized stems (W) in the three host plant systems (LDA > 3.0, p < 0.05).
A. Bacterial biomarkers (T vs J vs W)
Schefflera heptaphylla						Pueraria montana						Humulus scandens
genus	log_value	group	LDA_score	p_valued		genus	log_value	group	LDA_score	p_valued		genus	log_value	group	LDA_score	p_valued
Allorhizobium_Neorhizobium_Pararhizobium_Rhizobium	5.26636	EZCT	4.96161	0.00727671		Sphingomonas	5.68248	PLGW	5.32469	0.00727671		Methylobacterium_Methylorubrum	5.4223	LCHW	4.96315	0.0249144
Sphingomonas	5.32819	EZCJ	4.73405	0.0230698		Candidatus_Phytoplasma	5.33615	PLGJ	5.00869	0.0217947		Pseudomonas	4.91616	LCHT	4.58193	0.0124677
Halomonas	4.94984	EZCW	4.62865	0.00970984		Allorhizobium_Neorhizobium_Pararhizobium_Rhizobium	5.08436	PLGT	4.6959	0.0366005		Xanthomonas	4.71844	LCHJ	4.44756	0.0067859
Methylobacterium_Methylorubrum	5.16826	EZCJ	4.59651	0.0230698		Candidatus_Tremblaya	4.95312	PLGT	4.66681	0.00536573		Massilia	4.69586	LCHT	4.41184	0.0227667
Aureimonas	5.03746	EZCJ	4.55372	0.0183156		Candidatus_Moranella	4.87466	PLGT	4.58002	0.00536573		Allorhizobium_Neorhizobium_Pararhizobium_Rhizobium	4.53834	LCHJ	4.22089	0.00970984
Massilia	4.92317	EZCT	4.54832	0.00727671		Massilia	4.79035	PLGT	4.46191	0.00727671		Stenotrophomonas	4.50815	LCHJ	4.20912	0.00896627
Pseudomonas	4.86662	EZCT	4.46046	0.00970984		Stenotrophomonas	4.76154	PLGT	4.43518	0.0183156		Brevundimonas	4.45823	LCHJ	4.12443	0.0209549
Kosakonia	4.73322	EZCJ	4.45141	0.00608792		Aureimonas	4.82841	PLGT	4.37935	0.0183156		Hymenobacter	4.44381	LCHW	4.06731	0.0154048
Buchnera	4.66998	EZCT	4.36483	0.00715209		Buchnera	4.41197	PLGT	4.11113	0.0104854		Chryseobacterium	4.29487	LCHT	3.97936	0.0183156
Polaromonas	4.69877	EZCJ	4.33788	0.00970984		Polaromonas	4.39713	PLGJ	4.09614	0.00955322		Xylophilus	4.21069	LCHJ	3.84501	0.0173054
Pantoea	4.64282	EZCT	4.33012	0.00727671		Sphingobacterium	4.33941	PLGJ	4.03538	0.0173054		Herbaspirillum	4.0973	LCHJ	3.8339	0.0067859
Xanthomonas	4.67368	EZCJ	4.29553	0.0124677		Luteimonas	4.4418	PLGJ	4.02727	0.0296222		Klenkia	4.09642	LCHW	3.74943	0.0245937
Gluconacetobacter	4.58283	EZCW	4.28377	0.00536573		Hymenobacter	4.34161	PLGW	3.99277	0.0154048		Polaromonas	3.97058	LCHJ	3.69809	0.0145194
Sphingobacterium	4.4545	EZCT	4.16576	0.00896627		Verticiella	4.24248	PLGJ	3.95112	0.0173054		Mucilaginibacter	4.00442	LCHT	3.62751	0.0244399
Lachnoclostridium	4.39758	EZCW	4.04147	0.0307837		Xanthomonas	4.10839	PLGJ	3.85712	0.0132431		Bradyrhizobium	3.87231	LCHT	3.49427	0.0387742
Bradyrhizobium	4.2942	EZCW	3.93849	0.0183156		Pedobacter	4.11866	PLGJ	3.73182	0.0209549		Ralstonia	3.76186	LCHT	3.41469	0.0230698
Nocardioides	4.25065	EZCW	3.92029	0.0230698		Mucilaginibacter	4.10911	PLGJ	3.67117	0.0296222		Friedmanniella	3.67497	LCHW	3.38549	0.017074
Delftia	4.22256	EZCW	3.90821	0.0154048		Devosia	4.0963	PLGT	3.67057	0.0132081		Apibacter	1.48096	LCHJ	3.35097	0.0279228
Xylophilus	4.15638	EZCJ	3.88076	0.0217947		Chryseobacterium	4.08497	PLGW	3.66786	0.00970984		Bacillus	3.62967	LCHJ	3.31649	0.0497871
Blautia	4.20793	EZCW	3.87161	0.0244399		Ralstonia	3.97909	PLGW	3.62215	0.0154048		Cronobacter	2.77958	LCHT	3.27663	0.0279228
Bacteroides	4.17058	EZCW	3.86189	0.0124677		Falsirhodobacter	3.91092	PLGT	3.60294	0.0124677		Amnibacterium	3.4999	LCHW	3.23485	0.00921469
Ralstonia	4.23155	EZCW	3.85822	0.0154048		Flavobacterium	3.90013	PLGT	3.56685	0.00727671		Marmoricola	3.49131	LCHW	3.22045	0.0173766
Romboutsia	4.119	EZCW	3.80017	0.0231865		Curtobacterium	3.89378	PLGT	3.5019	0.0154048		Nocardioides	3.57103	LCHW	3.20227	0.0124677
Candidatus_Cardinium	2.79249	EZCT	3.72932	0.0152255		Pseudorhodoferax	3.82119	PLGW	3.49311	0.0151809		Frigoribacterium	3.46522	LCHJ	3.16622	0.0158446
Hymenobacter	4.12748	EZCJ	3.72358	0.00727671		Siphonobacter	3.69785	PLGW	3.42939	0.0145194		Rhodoferax	3.43828	LCHT	3.16164	0.0231865
Achromobacter	3.86097	EZCT	3.71415	0.00921469		Flavisolibacter	3.73197	PLGW	3.41673	0.0180604		Asaia	3.37835	LCHT	3.15637	0.0173054
Friedmanniella	4.0315	EZCW	3.68631	0.00727671		Variovorax	3.8304	PLGJ	3.36532	0.0263941		Kosakonia	3.44154	LCHW	3.14188	0.00921469
Novosphingobium	4.02065	EZCW	3.68005	0.0183156		Altererythrobacter	3.68366	PLGW	3.35259	0.00715209		Jatrophihabitans	3.39877	LCHW	3.11939	0.0152255
Alistipes	3.97289	EZCW	3.67651	0.0218688		Gilliamella	2.51227	PLGT	3.34998	0.00536573		Flavobacterium	3.37224	LCHJ	3.05756	0.0104854
Curtobacterium	3.94156	EZCJ	3.67136	0.0151809		Sphaerotilus	3.61603	PLGW	3.33755	0.0156699		Acidiphilium	3.2946	LCHW	3.02493	0.0279228
Legionella	2.67428	EZCT	3.66752	0.0239824		Janthinobacterium	3.60196	PLGT	3.33107	0.00896627		Paenibacillus	3.18937	LCHJ	3.00531	0.00608792
Jiangella	2.43728	EZCJ	3.66665	0.0279228		Arsenophonus	3.45036	PLGT	3.32501	0.00536573
Saccharibacillus	3.00544	EZCT	3.64513	0.0132431		Lachnoclostridium	3.66787	PLGW	3.30474	0.0183156
Quadrisphaera	4.05059	EZCJ	3.61272	0.0183156		Blautia	3.61943	PLGW	3.2717	0.0183156
Brevundimonas	4.02781	EZCT	3.60569	0.0497871		Fibrella	1.61118	PLGJ	3.22987	0.0279228
Staphylococcus	3.85614	EZCW	3.57845	0.0249144		Ideonella	3.50458	PLGW	3.22503	0.0117159
Escherichia_Shigella	3.87139	EZCW	3.55176	0.0183156		Wolbachia	3.17745	PLGT	3.2182	0.00536573
Verticiella	3.6947	EZCT	3.54938	0.0119277		Fluviicola	2.63915	PLGT	3.21245	0.00536573
Enterococcus	3.83243	EZCW	3.53186	0.041624		Agaricicola	2.62463	PLGT	3.20451	0.0104854
Nitriliruptor	3.81507	EZCW	3.50858	0.0180604		Methylibium	3.43135	PLGW	3.20168	0.00536573
Rubellimicrobium	3.7969	EZCW	3.49951	0.00715209		Bosea	2.66809	PLGW	3.19289	0.0430405
Candidatus_Solibacter	3.69724	EZCW	3.47157	0.0104854		Aurantimonas	3.46195	PLGT	3.10926	0.0198369
Mycoplana	2.86579	EZCJ	3.46213	0.0230769		Rosenbergiella	3.3877	PLGW	3.10724	0.0192425
Herbaspirillum	3.21221	EZCT	3.45646	0.0159		Cellvibrio	2.44851	PLGT	3.07622	0.0279228
Mucilaginibacter	3.61493	EZCT	3.44537	0.0122773		Aquabacterium	3.38953	PLGT	3.07411	0.0361782
Solirubrobacter	3.75107	EZCW	3.44076	0.0244399		Saccharibacillus	3.33222	PLGT	3.0283	0.0370273
Acinetobacter	3.69718	EZCW	3.43833	0.034923		Hylemonella	1.82192	PLGJ	3.01069	0.0279228
Arsenophonus	3.30393	EZCT	3.43661	0.00921469		Erwinia	3.2414	PLGT	3.01052	0.0426223
Siphonobacter	3.00969	EZCT	3.43277	0.0360116
Serratia	3.02573	EZCT	3.42714	0.0239824
Rhodoferax	3.54759	EZCT	3.41903	0.0217947
Dubosiella	3.66232	EZCW	3.38977	0.0173054
Ensifer	3.60705	EZCW	3.3772	0.00896627
Paucibacter	3.52735	EZCW	3.37478	0.0154048
Acidovorax	3.65661	EZCT	3.36601	0.0281798
Chryseobacterium	3.6287	EZCT	3.319	0.0373112
Microbacterium	3.66221	EZCJ	3.3117	0.0249144
Deinococcus	3.25997	EZCJ	3.30793	0.0151809
Reyranella	3.55723	EZCW	3.30393	0.0383346
Rhodococcus	2.94594	EZCW	3.26878	0.0435165
Enhydrobacter	3.32592	EZCW	3.24683	0.017074
Acidiphilium	3.37304	EZCW	3.23322	0.0159
Amnibacterium	3.63371	EZCJ	3.22348	0.0249144
Jatrophihabitans	3.11683	EZCW	3.19373	0.0152255
Williamsia	3.25038	EZCW	3.15086	0.00536573
Alloprevotella	2.96881	EZCW	3.09957	0.044061
Aurantisolimonas	3.1595	EZCW	3.07807	0.0231865
Roseococcus	2.86632	EZCW	3.0707	0.0279228
Patulibacter	2.91376	EZCW	3.00559	0.0279228
B. Fungal biomarkers (T vs J vs W)
Schefflera heptaphylla						Pueraria montana						Humulus scandens
genus	log_value	group	LDA_score	p_valued		genus	log_value	group	LDA_score	p_valued		genus	log_value	group	LDA_score	p_valued
Uwebraunia	5.72634	EZCW	5.31483	0.00727671		Cladosporium	5.46706	PLGT	5.06612	0.0154048		Pseudoascochyta	5.47524	LCHW	5.18318	0.0194158
Colletotrichum	5.41637	EZCT	5.10676	0.00727671		Phaeosphaeria	5.14584	PLGW	4.82984	0.00727671		Hannaella	5.25241	LCHJ	4.9215	0.0154048
Hyweljonesia	5.39956	EZCW	5.0952	0.00970984		Elsinoe	5.07491	PLGJ	4.81646	0.0182164		Cercospora	5.07097	LCHJ	4.70937	0.0183156
Neodidymella	5.24067	EZCJ	4.93978	0.00727671		Pseudoascochyta	5.10253	PLGW	4.81504	0.0231865		Cladosporium	5.30342	LCHJ	4.67128	0.0387742
Cladosporium	5.27036	EZCT	4.7982	0.0183156		Acremonium	5.04873	PLGJ	4.77132	0.0067859		Phaeosphaeria	5.0243	LCHJ	4.65511	0.0209549
Alternaria	4.91745	EZCJ	4.58574	0.00727671		Periconia	4.94882	PLGT	4.6328	0.0180604		Neodidymella	4.97692	LCHJ	4.6505	0.0366005
Pseudopeyronellaea	4.73675	EZCT	4.42868	0.0183156		Fusarium	4.92603	PLGT	4.53545	0.0244399		Fusarium	4.98738	LCHT	4.61884	0.0154048
Fusarium	4.70386	EZCT	4.39891	0.0183156		Hannaella	5.02361	PLGW	4.41925	0.0497871		Microdochium	4.87813	LCHW	4.60168	0.0230698
Dioszegia	4.48033	EZCJ	4.05853	0.0154048		Vishniacozyma	4.70517	PLGJ	4.36258	0.00715209		Alternaria	4.5609	LCHT	4.04419	0.0307837
Cercospora	4.50247	EZCJ	4.03269	0.0124677		Cercospora	4.81568	PLGJ	4.34252	0.0249144		Neosetophoma	4.39802	LCHT	3.99633	0.0497871
Strelitziana	4.27337	EZCJ	3.93886	0.00727671		Parafenestella	4.62106	PLGW	4.30845	0.0148071		Curvularia	4.26768	LCHJ	3.95686	0.0497871
Pseudocercospora	4.26671	EZCT	3.92649	0.0183156		Didymocyrtis	4.52151	PLGW	4.21598	0.0218688		Tilletia	2.50236	LCHT	3.82262	0.0468806
Hannaella	4.32664	EZCT	3.87387	0.0183156		Colletotrichum	4.33348	PLGT	4.0596	0.00608792		Aaosphaeria	4.07773	LCHW	3.79516	0.0148071
Epicoleosporium	4.1679	EZCJ	3.83776	0.0172889		Epicoccum	4.31837	PLGT	4.02382	0.0145194		Auriscalpium	2.41984	LCHJ	3.77284	0.0279228
Anthracocystis	1.7897	EZCT	3.82754	0.0279228		Filobasidium	4.34546	PLGJ	3.99007	0.0245937		Claviceps	4.07079	LCHJ	3.73697	0.0194158
Microdochium	2.66132	EZCW	3.78518	0.00921469		Setophaeosphaeria	4.23905	PLGT	3.93344	0.00715209		Bulleribasidium	2.77605	LCHJ	3.70782	0.0145579
Stagonosporopsis	4.12107	EZCJ	3.77871	0.0154048		Leptospora	4.22191	PLGJ	3.8884	0.00970984		Erythrobasidium	4.01608	LCHJ	3.69986	0.0467914
Filobasidium	4.01544	EZCJ	3.74316	0.0218688		Pyrenochaetopsis	4.12591	PLGW	3.86591	0.00909205		Ramulariopsis	2.73731	LCHJ	3.68956	0.00536573
Neosetophoma	4.16653	EZCJ	3.74154	0.0230698		Pseudorobillarda	4.19074	PLGW	3.82002	0.00536573		Monocillium	2.31065	LCHW	3.6773	0.0279228
Setophaeosphaeria	3.95967	EZCJ	3.68871	0.00727671		Gibellulopsis	4.043	PLGT	3.74946	0.00715209		Golubevia	2.47223	LCHT	3.59528	0.0468806
Devriesia	2.60452	EZCW	3.68006	0.0279228		Stagonospora	4.03664	PLGW	3.74097	0.0279228		Devriesia	3.61863	LCHW	3.41821	0.0279228
Periconia	3.99423	EZCT	3.60093	0.0307837		Ascochyta	4.01404	PLGT	3.71273	0.0104854		Buckleyzyma	3.55832	LCHJ	3.41714	0.0173766
Ramularia	3.96788	EZCJ	3.54209	0.0244399		Saitozyma	3.9876	PLGW	3.69558	0.00921469		Pseudorobillarda	3.56663	LCHW	3.36776	0.00536573
Epicoccum	3.82303	EZCT	3.50852	0.0183156		Limonomyces	3.94962	PLGW	3.66715	0.00536573		Saitozyma	3.68359	LCHW	3.36746	0.0209549
Sporobolomyces	3.74353	EZCW	3.50112	0.0104854		Paraconiothyrium	3.93428	PLGW	3.63781	0.0148071		Wojnowiciella	2.95162	LCHW	3.3494	0.0426223
Elsinoe	3.80881	EZCJ	3.49887	0.0214861		Angustimassarina	3.90357	PLGW	3.63202	0.0397334		Dioszegia	3.56485	LCHJ	3.32462	0.0492657
Ascochyta	3.76796	EZCT	3.49829	0.0497871		Trichothecium	3.90184	PLGT	3.61156	0.00608792		Leptospora	3.48681	LCHJ	3.2216	0.0432486
Dendryphion	2.54912	EZCT	3.48652	0.0343793		Microbotryozyma	4.00333	PLGW	3.60908	0.0279228		Sporobolomyces	3.44955	LCHJ	3.19981	0.0198369
Ramulariopsis	2.97025	EZCW	3.46655	0.0152255		Mycoleptodiscus	3.91825	PLGW	3.59384	0.0279228		Tilletiopsis	3.03654	LCHJ	3.19786	0.0397334
Dissoconium	3.73997	EZCW	3.46376	0.0244754		Uwebraunia	3.82977	PLGT	3.52531	0.0206259		Acremonium	3.31001	LCHT	3.11885	0.0379905
Zygophiala	3.07581	EZCW	3.45568	0.0127429		Dioszegia	3.78176	PLGJ	3.47402	0.0106363
Plectosphaerella	3.85982	EZCJ	3.44308	0.0132081		Paramyrothecium	3.68884	PLGW	3.44719	0.0279228
Stomiopeltis	3.66824	EZCJ	3.38375	0.0156699		Microdochium	3.69955	PLGW	3.41143	0.00921469
Mycosphaerella	3.31995	EZCW	3.3592	0.0230698		Schizothyrium	3.71137	PLGJ	3.40489	0.0082089
Lectera	3.61611	EZCJ	3.33869	0.0145194		Pseudocercospora	3.71579	PLGT	3.39939	0.0082089
Gibellulopsis	3.46986	EZCJ	3.31151	0.0198369		Dendryphiella	3.65389	PLGT	3.39175	0.00896627
Nigrospora	3.61443	EZCT	3.29867	0.00970984		Phomatospora	3.58115	PLGT	3.32636	0.00921469
Leptospora	3.59932	EZCT	3.29791	0.0230698		Paraphoma	3.71411	PLGT	3.31995	0.0249144
Aureobasidium	2.88096	EZCT	3.27919	0.0170445		Stilbella	2.48058	PLGT	3.29679	0.00921469
Pestalotiopsis	3.53006	EZCT	3.26563	0.0323784		Edenia	3.49202	PLGW	3.2939	0.0104854
Paraphoma	3.34767	EZCJ	3.25861	0.0345487		Paracylindrocarpon	3.37274	PLGT	3.28944	0.0279228
Vishniacozyma	3.23438	EZCW	3.23404	0.0206259		Helminthosporium	3.52074	PLGJ	3.26726	0.00896627
Neodevriesia	3.27541	EZCJ	3.21462	0.0366005		Fusariella	3.56024	PLGT	3.26152	0.0127429
Cystobasidium	3.13196	EZCJ	3.1954	0.0173766		Golubevia	3.53947	PLGT	3.19356	0.034923
Peniophora	2.55342	EZCT	3.18953	0.0279228		Stephanonectria	3.44635	PLGT	3.19226	0.00536573
Lecanicillium	3.0522	EZCW	3.1797	0.0370273		Acaromyces	2.24356	PLGJ	3.15475	0.0230769
Curvularia	3.203	EZCT	3.16866	0.0242431		Albifimbria	3.35887	PLGW	3.13086	0.0279228
Montagnula	3.28353	EZCJ	3.07313	0.0356108		Buckleyzyma	3.3362	PLGJ	3.11307	0.0106363
						Dinemasporium	3.02429	PLGW	3.10297	0.0279228
						Naohidea	2.36194	PLGJ	3.08764	0.0279228
						Neopestalotiopsis	3.29863	PLGJ	3.06042	0.0360116
						Neofusicoccum	2.30537	PLGT	3.05201	0.0279228
						Collarispora	3.26126	PLGJ	3.04458	0.0213647
						Neodevriesia	3.12364	PLGT	3.04354	0.0173766
						Lasiodiplodia	2.58748	PLGT	3.01445	0.0279228
						Meira	3.25607	PLGT	3.00866	0.0213647

## Sheet: Table S3
Table S3 Functional composition of bacterial and fungal communities predicted using the FAPROTAX and FUNGuild databases across the three host systems.
A. Functional composition of bacteria
function	EZCT1	EZCT2	EZCT3	EZCT4	EZCJ1	EZCJ2	EZCJ3	EZCJ4	EZCW1	EZCW2	EZCW3	EZCW4	PLGT1	PLGT2	PLGT3	PLGT4	PLGJ1	PLGJ2	PLGJ3	PLGJ4	PLGW1	PLGW2	PLGW3	PLGW4	LCHT1	LCHT2	LCHT3	LCHT4	LCHJ1	LCHJ2	LCHJ3	LCHJ4	LCHW1	LCHW2	LCHW3	LCHW4
chemoheterotrophy	0.26358	0.285882	0.250144	0.274975	0.321049	0.324835	0.321072	0.331348	0.293856	0.257912	0.272353	0.281753	0.258759	0.238177	0.278534	0.251404	0.295647	0.290181	0.277658	0.300081	0.308185	0.306498	0.294863	0.302278	0.363179	0.360701	0.345372	0.271903	0.324356	0.301822	0.349903	0.327769	0.312097	0.321044	0.319612	0.315972
aerobic_chemoheterotrophy	0.223896	0.233251	0.209155	0.235239	0.217394	0.218304	0.216847	0.240775	0.16819	0.140768	0.149751	0.171421	0.191244	0.210976	0.261686	0.206519	0.270612	0.2677	0.263487	0.273563	0.285146	0.274452	0.263775	0.283223	0.291451	0.282685	0.255151	0.150004	0.257878	0.257476	0.331491	0.258364	0.174086	0.166162	0.162233	0.175904
ureolysis	0.0320319	0.0462836	0.0304611	0.0368313	0.0864144	0.0831453	0.0883558	0.0769523	0.0427286	0.0446693	0.0379011	0.053548	0.0555783	0.0206379	0.0105264	0.0297811	0.0182657	0.0214687	0.0119886	0.0254431	0.0138576	0.0148304	0.0115518	0.0144375	0.0653759	0.0724003	0.0757867	0.0474464	0.0689638	0.0404217	0.0122743	0.0699663	0.0963439	0.124873	0.14818	0.133154
plant_pathogen	0.114931	0.0879745	0.109518	0.101413	0.0309757	0.0280733	0.032065	0.0389207	0.0108441	0.00524907	0.0112648	0.00716159	0.0466864	0.0747305	0.0637134	0.0681101	0.0396627	0.041526	0.0434083	0.0362737	0.0660345	0.0785678	0.0812713	0.0838498	0.0341824	0.0371543	0.0323099	0.0144809	0.050902	0.0548303	0.0632822	0.0412592	0.00196266	0.00696587	0.00655777	0.00634995
methylotrophy	0.0290349	0.0420156	0.0272085	0.0334607	0.0813767	0.0779704	0.0855544	0.0741988	0.0313317	0.0246055	0.0266362	0.0422016	0.04399	0.0156069	0.00777775	0.024336	0.0125477	0.0166733	0.00858736	0.0190208	0.0111829	0.00908789	0.00244809	0.00754207	0.0584846	0.0637028	0.0629861	0.0421008	0.060248	0.0320356	0.00078135	0.0602257	0.0900912	0.122895	0.144003	0.128067
methanol_oxidation	0.0290349	0.0420156	0.0270933	0.0334607	0.0813767	0.0779704	0.0851406	0.0741988	0.0290413	0.0246055	0.0266362	0.0422016	0.04399	0.0156069	0.00777775	0.024336	0.0125477	0.0166733	0.00858736	0.0190208	0.0111829	0.00851772	0.00244809	0.00754207	0.0584846	0.0633988	0.0629861	0.041223	0.060248	0.0319385	0.000703215	0.0602257	0.0900912	0.122287	0.144003	0.127859
nitrogen_fixation	0.103755	0.075843	0.101321	0.0677722	0.0270987	0.0232126	0.0220611	0.0226929	0.0221857	0.0191153	0.0410654	0.0323825	0.0395743	0.0761388	0.0790694	0.0792909	0.0302008	0.0309235	0.0597546	0.0233172	0.00645348	0.0106995	0.00878085	0.00960785	0.0127613	0.0196665	0.016433	0.0101559	0.0223532	0.0203145	0.0318294	0.0166312	0.00261398	0.00440092	0.00169051	0.00357479
animal_parasites_or_symbionts	0.0101175	0.010384	0.0165439	0.0369131	0.0124773	0.0121188	0.010179	0.0113422	0.0372	0.0537045	0.0340505	0.0356613	0.0432553	0.0502042	0.0423831	0.0435775	0.0442234	0.0450035	0.0475437	0.0417114	0.00987211	0.0155635	0.0144572	0.0141915	0.00424271	0.00689888	0.013939	0.0502227	0.0177608	0.0287006	0.0226805	0.0191201	0.0217455	0.0132297	0.00746642	0.00746539
human_associated	0.0100151	0.0102835	0.0160833	0.0371095	0.0109539	0.0120527	0.00978106	0.0107725	0.0367972	0.0513573	0.0319102	0.032115	0.0408695	0.0501333	0.0420709	0.0426372	0.0433234	0.0444594	0.0474763	0.0415995	0.00993706	0.0157729	0.0151567	0.0145405	0.00416798	0.00658645	0.013939	0.0479389	0.0172917	0.0287653	0.0215866	0.0190203	0.0213461	0.0125885	0.00742416	0.00678
nitrate_reduction	0.0101175	0.0115206	0.00864972	0.00960461	0.00898722	0.00830791	0.00569037	0.00740606	0.0345857	0.0240268	0.0254483	0.0299838	0.0498826	0.0445177	0.0397385	0.037423	0.0370382	0.0336527	0.0427011	0.0326933	0.0739936	0.00869808	0.0145379	0.00835465	0.00434234	0.00298079	0.00767339	0.0190913	0.0146595	0.0253202	0.0228509	0.0143804	0.0144681	0.00566314	0.00376138	0.00692111
human_pathogens_all	0.00756422	0.00922425	0.0138741	0.0365368	0.0099867	0.00862204	0.0078153	0.00682774	0.0214038	0.014453	0.0215875	0.01881	0.0394153	0.0478658	0.0416374	0.0385086	0.0418863	0.0432095	0.0461832	0.040145	0.0085023	0.0115606	0.00856563	0.0127437	0.00339582	0.00484695	0.00789064	0.0283123	0.0164586	0.0256764	0.0188163	0.0167772	0.0107946	0.00174147	0.00376843	0.00474399
fermentation	0.00716826	0.00968044	0.00848421	0.005195	0.012026	0.0194347	0.0112852	0.0132325	0.0526486	0.0691061	0.0809327	0.0580089	0.0151935	0.0091852	0.0082373	0.00833426	0.00797943	0.00437877	0.00560367	0.00490064	0.00905731	0.0100188	0.0199129	0.00964218	0.00684977	0.0118556	0.0190401	0.0759656	0.00518051	0.0126213	0.0098237	0.00594575	0.0358836	0.0209651	0.00774113	0.00848004
aromatic_compound_degradation	0.0036524	0.00423712	0.0038859	0.00379603	0.00798775	0.00810952	0.00635092	0.00605951	0.0251238	0.0236329	0.0175015	0.0148495	0.0143301	0.00798058	0.00598288	0.0118731	0.0158076	0.0142671	0.00862777	0.0135607	0.0515157	0.0652502	0.0722645	0.0639188	0.0207154	0.013688	0.0154684	0.00932085	0.0163116	0.0255145	0.0234121	0.017868	0.0055406	0.00820109	0.00533215	0.0103817
nitrogen_respiration	0.00741403	0.0091624	0.00664201	0.0076166	0.00464273	0.00386876	0.00291283	0.00240827	0.0150222	0.0106187	0.0151973	0.0086802	0.0297281	0.0406735	0.0394523	0.0335678	0.032364	0.0310595	0.0410779	0.0299633	0.00315884	0.00354905	0.00336276	0.00211155	0.00156092	0.00115685	0.0017641	0.00897114	0.0125802	0.0237531	0.0172749	0.0121988	0.00917065	0.00193046	0.000774817	0.0033396
nitrate_respiration	0.00741403	0.0091624	0.00664201	0.0076166	0.00464273	0.00386876	0.00291283	0.002391	0.0150222	0.0106187	0.0151973	0.0086802	0.0297281	0.0406735	0.0394523	0.0335678	0.032364	0.0310595	0.0410105	0.0299633	0.00315884	0.00354905	0.00336276	0.00211155	0.00156092	0.00115685	0.0017641	0.00897114	0.0125802	0.0237531	0.0172749	0.0121988	0.00917065	0.00193046	0.000774817	0.0033396
hydrocarbon_degradation	0.0046423	0.0036263	0.00594398	0.00217617	0.0131222	0.013334	0.0104177	0.00605951	0.0540071	0.0367596	0.0488382	0.0373611	0.0084905	0.00386186	0.00217638	0.00553908	0.00476497	0.00283982	0.00167706	0.00261815	0.00484749	0.0157089	0.00766172	0.00458361	0.008145	0.00628246	0.010741	0.00764367	0.00215621	0.00200749	0.000674802	0.00379483	0.0194095	0.0116705	0.00636759	0.00648434
plastic_degradation	0.00139952	0.00204897	0.000870729	0.00220071	0.00311933	0.00224024	0.00479901	0.00427273	0.00037121	0.00360924	0.00121865	0.00542728	0.00103764	0.00248895	0.00175151	0.00147025	0.00375903	0.00300137	0.00198688	0.00333423	0.046367	0.0544866	0.0642046	0.0589289	0.0179422	0.00945746	0.00855109	0.00354706	0.00419341	0.00428048	0.00627921	0.00421734	0.000738168	0.00466416	0.00280343	0.00362854
ligninolysis	0.00101038	0.00161598	0.000539708	0.00173439	0.00253899	0.00141358	0.00425782	0.00248595	0.00037121	0.000345651	0.00121865	0	0.00039385	0.000779458	0.000494238	0.000581261	0.000718527	0.00114783	0.000915985	0.00102936	0.0461722	0.0544866	0.0642422	0.0589117	0.0179422	0.00938991	0.00835122	0.00520997	0.0040184	0.00361995	0.00582461	0.0038102	0.000425532	0.00466416	0.00276821	0.00297003
human_gut	0.00349538	0.00181701	0.00390749	0.000482685	0.00111232	0.00524101	0.00231594	0.00475611	0.0215776	0.0396534	0.0181773	0.0202078	0.0017799	0.00305583	0.000797718	0.00484669	0.00243543	0.00214262	0.00221588	0.00226012	0.00227909	0.00475922	0.00854949	0.00168238	0.00154431	0.0027528	0.0068739	0.0400168	0.00126012	0.00449418	0.0033598	0.00222774	0.0176987	0.0114073	0.00458551	0.00405187
mammal_gut	0.00349538	0.00181701	0.00390749	0.000482685	0.00111232	0.00524101	0.00231594	0.00475611	0.0215776	0.0396534	0.0181773	0.0202078	0.0017799	0.00305583	0.000797718	0.00484669	0.00243543	0.00214262	0.00221588	0.00226012	0.00227909	0.00475922	0.00854949	0.00168238	0.00154431	0.0027528	0.0068739	0.0400168	0.00126012	0.00449418	0.0033598	0.00222774	0.0176987	0.0114073	0.00458551	0.00405187
dissimilatory_arsenite_oxidation	0.0498365	0.0361779	0.0660027	0.0238724	0.0127272	0.0110855	0.0136967	0.0140784	0	0.000835993	0.000911428	0.00406399	9.09e-05	0.00100089	7.8e-05	0.000256439	0	0	0.000330024	0	0.000165322	0.000686537	0	0	0	0	0	0	0	9.07e-05	0	9.99e-05	0	0	0	0
arsenite_oxidation_detoxification	0.0498365	0.0361779	0.0660027	0.0238724	0.0127272	0.0110855	0.0136967	0.0140784	0	0.000835993	0.000911428	0.00369297	9.09e-05	0.00100089	7.8e-05	0.000256439	0	0	0.000330024	0	0.000165322	0.000686537	0	0	0	0	0	0	0	9.07e-05	0	0	0	0	0	0
chitinolysis	0.000450577	0.000951033	0.00107942	0.000899921	0.00106396	0.0032653	0.000565057	0.00117392	0.0103702	0.00131026	0.00451617	0	0.00289328	0.00325955	0.00299144	0.00510313	0.0132965	0.0107641	0.0059539	0.0100027	0.00041921	0.00043054	0.00455722	0.000904133	0.000788761	0	0.000547479	0.00264067	0.0121882	0.0207419	0.024989	0.0118685	0	0.00108673	0	0.000786185
aromatic_hydrocarbon_degradation	0.00161115	0.00129897	0.00123054	0.000499047	0.00369967	0.00250477	0.0012097	0.000932232	0.0074084	0.0119611	0.00863296	0.00338234	0.00526395	0.00224094	0.00157809	0.00417995	0.00072609	0.00114783	0.00113825	0.00123076	0.00138753	0.00586466	0.00618211	0.00208866	0.00276482	0.00271058	0.00451887	0.00314026	0.000266026	0.000349691	0.000504326	0.000384092	0.0029353	0.00120148	0.00117631	0.00498589
nitrite_respiration	0.00164529	0.000595362	0.000863533	0.000327244	0.00199895	0.000529061	0.00162354	0.000647383	0.00456509	0.00489538	0.0122787	0.00602264	0.00260547	0.00284325	0.00169949	0.00158992	0.00269258	0.00306089	0.001933	0.0044531	0.00206653	0.00159416	0.00182396	0.00132759	0.00134505	0.00115685	0.00103413	0.00420366	0.00140714	0.00226652	8.52e-05	0.000676003	0.00619192	0.000776235	0.000640985	0.00275501
photoheterotrophy	0.00161798	0.00472424	0.000978671	0.00228253	0.00104784	0.00307517	0.00272978	0.00246006	0.000402802	0.00401116	0.000368667	0.00181197	0.00196925	0.00191321	0.00131797	0.00367562	0.0036002	0.00334147	0.00319921	0.0025734	0.000938795	0.00254252	0.00182396	0.00413727	0.00234138	0.0026008	0.000790802	0.00309743	0.00192519	0.00128868	0.00046881	0.00231992	0.00084238	0.000728986	0.000401496	0.00139094
phototrophy	0.00161798	0.00472424	0.000978671	0.00228253	0.00104784	0.00307517	0.00272978	0.00246006	0.000402802	0.00401116	0.000368667	0.00181197	0.00196925	0.00191321	0.00131797	0.00367562	0.0036002	0.00334147	0.00319921	0.0025734	0.000938795	0.00254252	0.00182396	0.00413727	0.00234138	0.0026008	0.000790802	0.00309743	0.00192519	0.00128868	0.00046881	0.00231992	0.00084238	0.000728986	0.000401496	0.00139094
dark_oxidation_of_sulfur_compounds	0.00183644	0.00238918	0.00167669	0.00278157	0.00394148	0.00639007	0.00682844	0.00546391	0.00319872	0.00321536	0.00244754	0.00166529	0.00301447	0.00209036	0.000372846	0.0027439	0.000620202	0.00165798	0.00101701	0.00194683	0.00193663	0.00132653	0.000172174	0.00154504	0.000290596	0.000329322	0.000903774	0.00118473	0.000315031	0.00135343	0.00106548	0.000145955	0.00104212	0.00222071	0.000838211	0.00215025
dark_thiosulfate_oxidation	0.00183644	0.00238918	0.00167669	0.00265886	0.00394148	0.00629913	0.00677273	0.00546391	0.00105044	0.00310282	0.00244754	0.00166529	0.00283269	0.00179807	0.000225442	0.00253874	0.000620202	0.00124136	0.00101701	0.0018797	0.00170636	0.00123926	0	0.000555069	0.000290596	0	0.000903774	0.00118473	0.00020302	0.00132753	0.00100155	0.000115228	0.00104212	0.00222071	0.000838211	0.00215025
human_pathogens_pneumonia	0.000853365	0.000131444	0.000705219	0.000613582	0.00182969	0.000760525	0.00125745	0.00120845	0.00348306	0.00674421	0.00189454	0.00684234	0.00232523	0.00294954	0.00217638	0.00188055	0.00291192	0.00496544	0.00249202	0.00353563	0.00164732	0.00126835	0.00112451	0.00398276	0	0.000439096	0.00127745	0.0025122	2.1e-05	0.000783567	0.000745834	0	0.000677377	0.000485991	0.00112701	0.000403172
predatory_or_exoparasitic	0.00109913	0.00118299	0.000741199	0.000654488	0.0010559	0.000619994	0.000748104	0.00038843	0.000458089	0.00594841	0.00214032	0.000345137	0	0.000832603	0.00121392	0.00158992	0.00181522	0.00352002	0.00119213	0.00161117	0.000950604	0.00105308	1.08e-05	0.000898411	0.0030222	0.00277813	0.00268525	0.00306889	0.00218422	0.00180026	0.00114361	0.0036796	0.00343899	0.0026257	0.00418401	0.00345384
denitrification	0.000976249	0.000425259	0.000395786	0.00014726	0.00185387	3.31e-05	0.000811772	0.00014674	0.00323821	0.00449346	0.00738359	0.00100953	0.00227978	0.00234723	0.00133531	0.00102575	0.00169421	0.00230417	0.00121907	0.00378178	0.00118678	0.000837808	0.000963096	0.000818298	0.000589495	0.000236437	0.000260704	0.00128465	0.000637063	0.00112678	8.52e-05	0.000614548	0.000138949	0.000215996	3.52e-05	0.000839941
nitrate_denitrification	0.000976249	0.000425259	0.000395786	0.00014726	0.00185387	3.31e-05	0.000811772	0.000129477	0.00323821	0.00449346	0.00738359	0.00100953	0.00227978	0.00234723	0.00133531	0.00102575	0.00169421	0.00230417	0.00115172	0.00378178	0.00118678	0.000837808	0.000963096	0.000818298	0.000589495	0.000236437	0.000260704	0.00128465	0.000637063	0.00112678	8.52e-05	0.000614548	0.000138949	0.000215996	3.52e-05	0.000839941
nitrite_denitrification	0.000976249	0.000425259	0.000395786	0.00014726	0.00185387	3.31e-05	0.000811772	0.000129477	0.00323821	0.00449346	0.00738359	0.00100953	0.00227978	0.00234723	0.00133531	0.00102575	0.00169421	0.00230417	0.00115172	0.00378178	0.00118678	0.000837808	0.000963096	0.000818298	0.000589495	0.000236437	0.000260704	0.00128465	0.000637063	0.00112678	8.52e-05	0.000614548	0.000138949	0.000215996	3.52e-05	0.000839941
nitrous_oxide_denitrification	0.000976249	0.000425259	0.000395786	0.00014726	0.00185387	3.31e-05	0.000811772	0.000129477	0.00323821	0.00449346	0.00738359	0.00100953	0.00227978	0.00234723	0.00133531	0.00102575	0.00169421	0.00230417	0.00115172	0.00378178	0.00118678	0.000837808	0.000963096	0.000818298	0.000589495	0.000236437	0.000260704	0.00128465	0.000637063	0.00112678	8.52e-05	0.000614548	0.000138949	0.000215996	3.52e-05	0.000839941
xylanolysis	0.00161798	0.00189434	0.000568493	0.000932645	0.000314351	0.00477808	0.00105849	0.000250322	0.000118471	0.00111734	0.00141322	0.000776558	0.000817996	0.000318869	0.000138734	0.00735124	0.000521877	0.000408118	0.000471463	0.00109649	0.000484159	0.000634174	0.000667172	0.000268951	0.000415138	0.000793751	0.00106889	0.00656599	0.000658065	0.00059577	0.00176869	0.000837321	0.0010508	0.000472491	0.00092978	0
nitrite_ammonification	0.000600769	0.000170104	0.000467747	0.000179984	0.000145085	0.000495995	0.000811772	0.000517907	0.00132688	0.00040192	0.00489508	0.00501312	0.000325684	0.000496019	0.000364176	0.000564165	0.000998374	0.000756719	0.000781282	0.000671321	0.000596342	0.000756355	0.000860868	0.00050929	0.00075555	0.000920414	0.000773422	0.00291901	0.000770076	0.00113973	0	6.15e-05	0.00605297	0.000560239	0.000605766	0.00191507
fumarate_respiration	0.000457403	0	0	0.000179984	0.000362713	0.000495995	0.000533223	0.00063012	0.00132688	0.00291794	0.00655409	0.00501312	0.000325684	0.000221437	0.000294809	0.000564165	0.000499187	6.8e-05	0.000249202	4.48e-05	0.000259792	0	0.000355108	0.000108725	0.00075555	0.000920414	0.000773422	0.00119187	0.000350035	0.00113973	0	6.15e-05	0.00605297	0.000560239	0.000605766	0.00191507
human_pathogens_diarrhea	0.000334519	0	0	0.000179984	9.67e-05	0.00185171	0.000421803	0.000517907	0.00132688	0.00040192	0.00531495	0.00501312	0.000325684	0.000265724	0.000294809	0.000564165	0.000499187	6.8e-05	0.000249202	4.48e-05	0.000259792	0	0.000355108	0	0.00075555	0.0010133	0.00179886	0.00153444	0.000448044	0.00113973	0.000532739	6.15e-05	0.00605297	0.000560239	0.00092978	0.00191507
human_pathogens_gastroenteritis	0.000334519	0	0	0.000179984	9.67e-05	0.000495995	0.000421803	0.000517907	0.00132688	0.00040192	0.00526375	0.00688548	0.000325684	0.000221437	0.000294809	0.000564165	0.000499187	6.8e-05	0.000249202	4.48e-05	0.000259792	0	0.000355108	0	0.000772156	0.000920414	0.00129483	0.00119187	0.000287028	0.00160599	0	6.15e-05	0.00605297	0.000560239	0.000605766	0.00191507
human_pathogens_meningitis	0.00044375	0.000757734	0.000899514	0.000106354	0.00026599	0.000322397	0	0.000112213	0.00307235	0.00317517	0	0	0.00111338	0	0	0	0	0	0	0	0.000324741	0	0.000602607	0	2.49e-05	9.29e-05	0.00117317	0.0180208	0	0.000103612	0	9.22e-05	0	0	0	0.000248622
manganese_oxidation	2.73e-05	0.000889178	0	0.000392693	0.00082215	0.00028933	0.00105053	0.000250322	0	0.00213017	9.22e-05	0.00798992	0.000439294	4.43e-05	8.67e-05	0.00041885	0.000121015	0.000280581	0	0.000581812	0.00119268	0.000855263	9.68e-05	0.000463511	0.00066422	0.000346211	0.000947225	0.00122042	0.00113411	0.000239603	0.000454604	0.00174378	0.000877117	0.00164697	0.000824124	0.000658514
human_pathogens_septicemia	0.000928461	0	0.000309433	5.73e-05	0.00116068	0.000388529	0.000580974	0.00132066	0.00348306	0.00501596	0.00189454	0.00204494	0.00115883	9.74e-05	0	3.42e-05	0.000128578	0	0	0	0.000525489	0	0.000301304	0.0004349	0	0	0.0014947	0.00150589	0	0.000887179	0	9.22e-05	0.000234477	0.000485991	0.000648029	0.000349415
dark_hydrogen_oxidation	0.000395961	0.000386599	0.000273452	4.09e-05	0.00199895	0.00036373	0.000867482	0.000319376	0.00158752	0.00299028	0.000849983	0.00093187	0.00039385	0.00094775	0.000684997	0.00075222	0.000446243	0.00132638	0.000114498	0.000604189	0.00112183	0.00070981	0.00163027	0.000257506	0	0.000236437	0.000260704	0.00139884	0	0.000718809	0	5.38e-05	0	0.000215996	0	0.000839941
arsenate_detoxification	9.56e-05	0.000603094	0.000345413	0.000130898	0.000459437	0.000826658	0.000405886	0.00178678	0	0.00108518	0	0.0010009	0.000871014	0.00193979	0.00125727	0.00111123	0.0030405	0.00214262	0.00150195	0.00230487	0.000194844	0	0	0	0	6.76e-05	0	0	0.000175017	0.000660528	0.000454604	0.000407138	0	0	0	0.000503965
dissimilatory_arsenate_reduction	9.56e-05	0.000603094	0.000345413	0.000130898	0.000459437	0.000826658	0.000405886	0.00178678	0	0.00108518	0	0.0010009	0.000871014	0.00193979	0.00125727	0.00111123	0.0030405	0.00214262	0.00150195	0.00230487	0.000194844	0	0	0	0	6.76e-05	0	0	0.000175017	0.000660528	0.000454604	0.000407138	0	0	0	0.000503965
intracellular_parasites	0.000628076	0.000201031	0.000230275	0.000188165	0.000104784	0.000173598	0	0	0.00259057	0.00150318	0	0.00104404	0.00123457	0.00103633	0.00111854	0.000478686	0.000642892	0	7.41e-05	0.000134264	0.000106279	0.00012218	1.08e-05	0.000343342	0.000174358	0.000337767	0.000808183	0.000264067	0.000280028	0.000278458	0.000355159	0.00268865	0	0.00053324	7.04e-05	9.41e-05
aerobic_anoxygenic_phototrophy	0.000382307	0.000618558	0.000100746	0.000343606	1.61e-05	0	0.000557099	0.000129477	0	0.000144691	2.05e-05	0.000880099	0.000568053	0.00094775	0.000251455	0.000564165	0.00108157	0.00108832	0.00101028	0.00152166	0.000454637	0.00021527	0.000597227	0.00201427	0.000273991	8.44e-05	0	0	0.000140014	0	0	0.000284228	0.00084238	0.000728986	0.00020427	0.00133047
cellulolysis	1.37e-05	0.000162372	0.000172707	8.18e-05	0.00128159	0	0.000310384	0	0.00105834	0.0010048	0.00472099	0.000405536	0.000272665	0.000664311	0.000468226	0.000179507	0.000400862	0.000246571	0.000148174	0	4.72e-05	0	0	0	7.47e-05	0.000379987	0.000121662	0.00261212	0.000364036	0	0.000433294	3.84e-05	0.000521059	0.000330744	4.23e-05	0.000369574
aliphatic_non_methane_hydrocarbon_degradation	0.000184327	0.000170104	0.000136726	5.73e-05	0.000225688	4.96e-05	0.000175088	0.000189899	0.000339618	0.00114949	0.000215056	0.000698902	0.00263576	0.000256867	6.07e-05	0.00259858	0.000332791	0.000935271	0.000552285	0.000716076	0.000206653	0.000325814	0	9.16e-05	0.000473257	0.00040532	0.000104282	0.000456764	6.3e-05	9.71e-05	0	0	0	0.000161997	4.23e-05	0.000396452
human_pathogens_nosocomia	0.000245769	0	0	0.000294519	0.000137025	2.48e-05	0.000135295	0.000474748	0.000450191	0.00156749	0.00167949	0.00290778	0.000166629	0.00014172	0	3.42e-05	5.29e-05	9.35e-05	0	0	0.000307027	0	0.000139891	3.43e-05	0	0	0.000617	0.00225527	0	0.000356167	0	0	0	3.37e-05	0	0.000100793
respiration_of_sulfur_compounds	0.000607596	0.000386599	0	0	1.61e-05	0.00103332	0.000254674	0	1.58e-05	0.00257229	0.001659	0	0	0	0	1.71e-05	3.78e-05	0	0	8.95e-05	0	0.000139635	0	0	2.49e-05	1.69e-05	0	0.00139884	0	0.000278458	0	4.61e-05	0.00151976	0	0.000133832	0
anoxygenic_photoautotrophy	0.000218461	0.000649486	0.000107942	0.000122716	9.67e-05	3.31e-05	0.000724228	0	0	0.00069934	0	0.00016394	0	0.000203722	0.000216771	0	0.000468933	0.000646187	0.000828428	0.000358038	0.000490063	0.000145453	0.00038739	0.00161943	0.000182661	0	0	0	4.9e-05	0	0	6.15e-05	0	0	0	0
photoautotrophy	0.000218461	0.000649486	0.000107942	0.000122716	9.67e-05	3.31e-05	0.000724228	0	0	0.00069934	0	0.00016394	0	0.000203722	0.000216771	0	0.000468933	0.000646187	0.000828428	0.000358038	0.000490063	0.000145453	0.00038739	0.00161943	0.000182661	0	0	0	4.9e-05	0	0	6.15e-05	0	0	0	0
nitrate_ammonification	0.00026625	0.000170104	0.000467747	0	4.84e-05	0	0.000389969	0	0	0	0	0	0	0.000274582	6.94e-05	0	0.000499187	0.000688699	0.00053208	0.000626566	0.000336549	0.000756355	0.00050576	0.00050929	0	0	0	0.00172714	0.000483048	0	0	0	0	0	0	0
dark_sulfide_oxidation	5.46e-05	0	0	0.000122716	0	9.92e-05	0	0.000258953	0.00105044	0	0	0.000371022	0	0.000513734	0	0.000324822	0	0.000263576	0	0	0.000129896	0.000570175	0	0.00121886	0.000116239	0	0.000373676	0.000549545	0.00020302	0	0.000632183	0.000115228	0	0.000263245	0	0.000389733
anoxygenic_photoautotrophy_S_oxidizing	0.000109231	0.00015464	0.000107942	0.000122716	9.67e-05	3.31e-05	0.000541182	0	0	0.00024919	0	0.00016394	0	0.000203722	0.000216771	0	0.000468933	0.000646187	0.000828428	0.000358038	0.000490063	0.000145453	0.00038739	0.00161943	0.000182661	0	0	0	0	0	0	6.15e-05	0	0	0	0
anoxygenic_photoautotrophy_H2_oxidizing	0	0.000293815	2.16e-05	0	0	0	0	0	0	0.00045015	0	0	0	0.000203722	0.000216771	0	0.000363045	0.000646187	0.000828428	0.000358038	0.000454637	0.000145453	0.00038739	0.00147065	0.000182661	0	0	0	4.9e-05	0	0	0	0	0	0	0
sulfate_respiration	7.51e-05	0.000386599	0	0	1.61e-05	0.00103332	0	0	0	0.00117361	0.001659	0	0	0	0	1.71e-05	3.78e-05	0	0	8.95e-05	0	0.000139635	0	0	0	1.69e-05	0	0.00139884	0	0	0	0	0	0	0	0
iron_respiration	0.000129711	0	0	0	0	0	0.00011142	0	1.58e-05	0.0039147	0	0	0	0	0	5.13e-05	0	0.000263576	0	0	0	0.000221088	0	0.000108725	7.47e-05	0	0	0	0.000217021	0.000278458	0	4.61e-05	0.000138949	0	0	0
methanotrophy	0	0	0.000115138	0	0	0	0.000413845	0	0.00229044	0	0	0	0	0	0	0	0	0	0	0	0	0.000570175	0	0	0	0.00030399	0	0.000877844	0	9.71e-05	7.81e-05	0	0	0.000607488	0	0.000208305
invertebrate_parasites	0	0.000100516	0.000122334	8.18e-05	0.0005481	0	0.000262632	0	9.48e-05	0.000554649	0.000563242	0.000405536	0.000272665	0	4.34e-05	0.00041885	0	0.000544158	6.74e-05	0	0	0	0	0	5.81e-05	0	0	0	0.000364036	0	0.000411984	0.000176683	0	0.000330744	4.23e-05	0
chlorate_reducers	0	0	0	0	0	0	0	0	0	0.00251602	0.00168972	0	0	0.000115147	0	0	0	0	0	0	0	0	0	0.000108725	0	0	0	0	9.8e-05	0	6.39e-05	0	0	0	0	0
dark_iron_oxidation	0	0	0	0	0	0	0	0	7.9e-05	0	0	0	0	0.000513734	0	0	0	0.000263576	0	0	0.000129896	0	0.00063489	0.00121886	0.000182661	0	0	0.000549545	0	0	6.39e-05	0	0	0	0	0
dark_sulfur_oxidation	4.78e-05	0	0	0	0	0	0	0	7.9e-05	0	0	0.000371022	0	0.000522591	0	0	0	0	0	0	0.000129896	0	0	0.000440622	0	0	0	0.000549545	0	0.000718809	0	9.99e-05	0	0.000141747	0	0
knallgas_bacteria	0	0	0	0	0.000241809	0.000165332	0.000596891	0.000189899	0.000173758	0.000369766	0	0	0	0	0	0	0	0	0	0	6.49e-05	0	0	2.86e-05	0	0	0	0	0	0.000718809	0	0	0	0.000141747	0	0
aerobic_ammonia_oxidation	0.000484711	0.000231959	0.000352609	0	0	0	0.000342218	0	0	0	0	0.000189825	0	0	0	4.27e-05	5.29e-05	0	0	0	0.000247984	0	0	0	0	0	0	0	0	0	0	0	0	0	0	0
nitrification	0.000484711	0.000231959	0.000352609	0	0	0	0.000342218	0	0	0	0	0.000189825	0	0	0	4.27e-05	5.29e-05	0	0	0	0.000247984	0	0	0	0	0	0	0	0	0	0	0	0	0	0	0
sulfur_respiration	2.05e-05	0	0	0	0	0	0	0	1.58e-05	0.00139868	0	0	0	0	0	0	0	0	0	0	0	0	0	0	2.49e-05	0	0	0	0	0.000278458	0	4.61e-05	0	0	0	0
sulfite_respiration	0	0	0	0	0	0	0	0	0	0	0	0	0	0	0	0	0	0	0	0	0	0	0	0	0	0	0	0	0	0	0	0	0.00138081	0	0	0
thiosulfate_respiration	0.0005325	0	0	0	0	0	0.000254674	0	0	0	0	0	0	0	0	0	0	0	0	0	0	0	0	0	0	0	0	0	0	0	0	0	0.000138949	0	0.000133832	0
anoxygenic_photoautotrophy_Fe_oxidizing	0	0	0	0	0	0	0	0	0	0	0	0	0	0	0	0	0	0	0	0	0	0	0	0.000778241	0.000182661	0	0	0	0	0	0	0	0	0	0	0
manganese_respiration	0	0	0	0	0	0	7.16e-05	0	0	0	0	0	0	0	0	5.13e-05	0	0	0	0	0	0	0	0	4.98e-05	0	0	0	0	0.000278458	0	0	0.000138949	0	0	0
arsenite_oxidation_energy_yielding	0	0	0	0	0	0	0	0	0	0	0	0.000371022	0	0	0	0	0	0	0	0	0	0	0	0	0	0	0	0	0	0	0	9.99e-05	0	0	0	0
dark_sulfite_oxidation	4.78e-05	0	0	0	0	0	0	0	0	0	0	0	0	0.000124005	0	0	0	0	0	0	0	0	0	0	0	0	0	0	0	0	0	0	0	0	0	0
reductive_acetogenesis	0	0	0	0	0	0	0	0	0	0	0	0	0	0	0	0	0	0	0	0	0	0	0	0	0	0	0	0	0	0	0	0	0	3.37e-05	0	0
B. Functional composition of fungi
function	EZCT1	EZCT2	EZCT3	EZCT4	EZCJ1	EZCJ2	EZCJ3	EZCJ4	EZCW1	EZCW2	EZCW3	EZCW4	PLGT1	PLGT2	PLGT3	PLGT4	PLGJ1	PLGJ2	PLGJ3	PLGJ4	PLGW1	PLGW2	PLGW3	PLGW4	LCHT1	LCHT2	LCHT3	LCHT4	LCHJ1	LCHJ2	LCHJ3	LCHJ4	LCHW1	LCHW2	LCHW3	LCHW4
Plant Saprotroph	0.270474	0.21963	0.213731	0.219483	0.283239	0.268182	0.270215	0.267903	0.325716	0.334321	0.350761	0.31455	0.167116	0.170174	0.173539	0.169461	0.155384	0.134645	0.117095	0.254646	0.192305	0.190343	0.155959	0.18676	0.20217	0.204749	0.196723	0.101649	0.187597	0.191829	0.195349	0.188845	0.148447	0.0921393	0.140216	0.151774
Plant Pathogen	0.270918	0.208847	0.206888	0.21987	0.232639	0.224282	0.215108	0.219402	0.0746275	0.068663	0.0674552	0.0735058	0.20276	0.204886	0.18501	0.197708	0.194116	0.222487	0.186444	0.299857	0.190414	0.179834	0.165993	0.180149	0.231555	0.231479	0.213915	0.157527	0.204228	0.230405	0.229007	0.230921	0.17042	0.161822	0.193751	0.190837
Undefined Saprotroph	0.056646	0.108791	0.113684	0.0919621	0.135226	0.142313	0.148102	0.156575	0.392507	0.422515	0.408755	0.414214	0.0828405	0.0796565	0.0846059	0.0761081	0.16616	0.113087	0.152979	0.1058	0.19599	0.207822	0.148694	0.200922	0.0983852	0.104239	0.120811	0.148186	0.101487	0.10806	0.104664	0.101641	0.249116	0.131231	0.232748	0.257837
Endophyte	0.236707	0.148912	0.144815	0.17286	0.100809	0.107425	0.106531	0.103752	0.0512028	0.0457589	0.0461421	0.0515934	0.162022	0.16167	0.167615	0.16302	0.125218	0.161576	0.170603	0.093667	0.179335	0.150021	0.158143	0.176976	0.137771	0.160808	0.128132	0.161988	0.136861	0.137106	0.138809	0.151754	0.158919	0.170201	0.16088	0.145452
Wood Saprotroph	0.0540544	0.104209	0.103264	0.095823	0.0817995	0.0869746	0.0919156	0.0834745	0.0489142	0.0384388	0.0422357	0.0471218	0.13377	0.135542	0.139027	0.144271	0.107445	0.144536	0.122129	0.0732506	0.0710137	0.0837756	0.109423	0.0637641	0.0985921	0.0904164	0.108121	0.11073	0.10016	0.0897193	0.0894511	0.100886	0.0834145	0.116743	0.0891956	0.0811278
Animal Pathogen	0.0589457	0.11005	0.123395	0.10734	0.0898601	0.0956263	0.101143	0.09555	0.0414846	0.0416557	0.0397512	0.0425935	0.109439	0.113677	0.11434	0.113733	0.0961205	0.087689	0.110851	0.0649909	0.0517815	0.0566678	0.104031	0.0736648	0.0926436	0.0881126	0.0991043	0.110538	0.0956205	0.0834676	0.0854169	0.0811419	0.0809249	0.117069	0.0686827	0.0759209
Animal Parasite	0.00538463	0.00704911	0.00661078	0.00692635	0.00785479	0.00684956	0.00662714	0.00808829	0.00394697	0.00573628	0.0038595	0.00599452	0.0172354	0.0155029	0.010106	0.0179846	0.0410511	0.0350043	0.02193	0.0241271	0.0449825	0.0482678	0.0492641	0.047388	0.0347422	0.028506	0.0352714	0.0261244	0.0607101	0.0642133	0.0563137	0.0505619	0.00736227	0.0204266	0.0155119	0.0177884
Fungal Parasite	0.00385607	0.00584908	0.00284453	0.00332815	0.00621523	0.00845459	0.00530892	0.00474902	0.0112024	0.00407858	0.00196881	0.00712052	0.0232538	0.0199637	0.0169356	0.0188473	0.0448297	0.0350968	0.0750742	0.0404602	0.0147298	0.0142955	0.0108129	0.00996218	0.00843057	0.00675364	0.00873405	0.054075	0.00857357	0.00745439	0.0102655	0.0106193	0.010406	0.0560247	0.00982702	0.00472184
Epiphyte	0.00305706	0.00369239	0.00210593	0.00480976	0.00783421	0.00706779	0.00535214	0.00814525	0.0114097	0.00476792	0.00335167	0.00532217	0.00191019	0.00162745	0.00208566	0.00182804	0.00847443	0.00535173	0.00246574	0.0074058	0.00767471	0.00146086	0.019729	0.0102881	0.00787424	0.00507433	0.00880635	0.0471581	0.00876842	0.0090315	0.0114664	0.00807934	0.0183556	0.0506191	0.0222305	0.0139912
Lichen Parasite	2.08e-05	0.000109093	0.000109875	0.000262749	0.000198942	6.34e-05	5.04e-05	1.42e-05	9.12e-05	0.000123096	0.00022657	0.00034833	6.11e-05	0.000101189	0.000109971	0	0	2.64e-05	0	0.00029499	0.011161	0.0186408	0.0117672	0.00926114	0	6.06e-06	0	9.13e-05	7.37e-05	0.000175865	0.00040398	0.000110893	0	1.22e-05	0.000934821	1.52e-05
Dung Saprotroph	0.000354341	0.00041959	0.00032352	0.000226256	0.000596827	0.000253427	0.000223306	0.000284799	0.000124379	0.00199412	0.000179693	0.000437438	0.000968169	0.000733617	0.00102386	0.00196771	0.000196128	0.000297318	0.000132935	0	0	0	0.000831314	0.000897826	0	0.000109125	0	0.0158381	0.000194854	1.13e-05	4.43e-05	3.17e-05	0.00449212	0.0156921	0.000630813	0.000591178
Ericoid Mycorrhizal	2.08e-05	0	0	0	0	0	0	0	0	0.000385701	0	2.43e-05	0	8.43e-06	2.65e-05	0	0	0	0	0	8.26e-05	0.0012298	0	0	0	4.85e-05	9.86e-05	0.0117884	0.000505566	0.000351729	0.000597669	0.000100332	0	0.0171605	0	0.00708655
Ectomycorrhizal	0	0.000159477	0	6.57e-05	0	0	0	0	0.000696523	0.000344669	0.000367199	9.72e-05	0.000318366	0	1.52e-05	0.000119131	0	0	0	0	0	0	0	0.00153122	0	0	3.94e-05	0.00316853	0	3.4e-05	0	0	0.00441202	0.00464906	0.00139083	0.000197059
Animal Symbiotroph	0	0	0	5.84e-05	0	0	0	0	0	0	0	0	0	0	0	8.22e-05	0	0	0	0	0.00019827	0	0	0.00475971	0	0	0	0.00360683	0	0	0	0	0.0020358	0.00628417	0	0
Orchid Mycorrhizal	0	0.000125877	0	0	0	0	0	0	0.000696523	0.000344669	0.000367199	0	0	0	0	0.000119131	0	0	0	0	0	0	0	0.00153122	0	0	3.94e-05	0.000146099	0	3.4e-05	0	0	0	7.73e-05	5.32e-05	0.000197059
|Arbuscular Mycorrhizal|	0	0	0	0	0	0	0	0	0	0	0	0	0	0	0	0	0	0.000475709	0	0	0	0	0	0	0	0	0	0.000862899	0	0	0	0	0.00131493	0.000227776	0	0
Endosymbiont	0	0	0	0	0	0	0	0	0	0	0	0	0	5.48e-05	0	0	0	0	0	0	0	0	0	0	0	0	0	0.00170754	0	0	0	0	0	0.000638585	0	0
|Protist Parasite|	0	0	0	0	8.92e-05	0	0	0	0	0.00109145	0.000992219	0.000178216	0	0	0	0	0	0	0	0	0	0	0	0	0	0	0	0	0	0	0	0	0	0	0	0
Clavicipitaceous Endophyte	0	0	0	0	0	2.11e-05	3.6e-05	0	3.32e-05	0	0	0	0	8.43e-06	1.52e-05	0	0	0	0	0	0	0	0	0	0	0	0	0.00158431	0	0	0	1.06e-05	0	0.000231839	0	0
Lichenized	0	0.000159444	0	0	0	0	0	0	0.000356554	0	1.56e-05	0	0	0.000598699	2.65e-05	7.39e-05	0	0	0.000158665	0.000419196	0	0	0	0	0	0	0	0	0	0	0	0	0	8.13e-06	0	0
Algal Parasite	0	0	0	0	0	0	0	0	0	0	0	0	0	0	0	0	0	1.98e-05	0	0	0	0	0	0.000227531	0	0	0	0.000634618	0	0	0	0	0	0.000305057	0	0
|Insect Pathogen|	0	0	0	0	0	0	0	0	0	0	0	0	0	0	0	0	0	0	0	0	0	0	0	0	0	0	0	0.000798981	0	0	0	0	0	8.13e-05	0	0
Endomycorrhizal	0	0.000125877	0	0	0	0	0	0	0	0	0	0	0	0	0	0	0	0	0	0	0	0	0	0	0	0	3.94e-05	0.00011414	0	3.4e-05	0	0	0	4.47e-05	0	0.000197059
|Pollen Saprotroph|	0	0	0	0	0	0	0	0	0	0	0	0	0.000300921	0	0	0	0	0	0	0	0	0	0	0	0	0	0	8.67e-05	0	0	0	0	8.01e-05	4.07e-05	0	0
Root Associated Biotroph	0	0	0	0	0	0	0	0	0	0.000344669	0	0	0	0	0	0	0	0	0	0	0	0	0	0	0	0	0	2.28e-05	0	0	0	0	0	1.63e-05	0	0
Undefined Symbiotroph	0	0	0	0	0	0	0	0	0	0	0	0	0	0	0	0	0	0	0	0	0	0	0	0	0	0	0	0.000296764	0	0	0	0	0	3.25e-05	0	0
Nematophagous	0	0	0	0	0	0	0	0	0	0	0	0	0	0	0	0	0	0	1.29e-05	0	0	0	0	0	0	0	0	7.3e-05	0	0	0	0	1.33e-05	7.73e-05	0	0
Bryophyte Parasite	0	0	0	0	0	0	0	0	0	0	0	0	0	0	0	0	0	0	0	0	0	0	0	0	0	0	0	8.22e-05	0	0	0	0	0	0	0	0
Insect Parasite	0	0	0	0	0	0	0	0	0	0	0	0	0	0	0	0	0	0	0	0	0	0	0	0	0	0	0	3.65e-05	0	0	0	0	0	1.22e-05	0	0
Fish Parasite	0	0	0	0	0	0	0	0	0	0	0	0	0	0	0	0	0	0	0	0	0	0	0	0	0	0	0	0	0	0	0	0	0	8.13e-06	0	0

## Sheet: Table S4
Table S4 Spearman correlation coefficients between core differential genera and key functions across the three host systems.
genus	function	rho	pvalue	relation
Allorhizobium_Neorhizobium_Pararhizobium_Rhizobium	nitrogen_fixation	0.808494	1.8331e-07	positive
Cladosporium	Wood Saprotroph	0.780438	3.53031e-07	positive
Microdochium	nitrogen_fixation	-0.753674	1.12168e-07	negtive
Allorhizobium_Neorhizobium_Pararhizobium_Rhizobium	plant_pathogen	0.751094	7.19061e-07	positive
Fusarium	Animal Pathogen	0.736937	1.09744e-06	positive
Massilia	nitrogen_fixation	0.734796	3.35086e-07	positive
Fusarium	Wood Saprotroph	0.72381	1.71354e-06	positive
Leptospora	nitrogen_fixation	0.695932	2.44812e-06	positive
Cladosporium	Animal Pathogen	0.674903	1.10676e-05	positive
Polaromonas	nitrogen_fixation	0.622165	5.09813e-05	positive
Cladosporium	Plant Pathogen	0.621622	7.44575e-05	positive
Allorhizobium_Neorhizobium_Pararhizobium_Rhizobium	Animal Pathogen	0.584041	0.00024079	positive
Leptospora	fermentation	-0.583934	0.000184935	negtive
Allorhizobium_Neorhizobium_Pararhizobium_Rhizobium	Wood Saprotroph	0.560875	0.000465491	positive
Dioszegia	Endophyte	-0.560853	0.000373583	negtive
Dioszegia	Undefined Saprotroph	0.550791	0.00049961	positive
Leptospora	Wood Saprotroph	0.534758	0.000779422	positive
Massilia	Animal Pathogen	0.532982	0.000817687	positive
Massilia	plant_pathogen	0.513289	0.00136735	positive
Polaromonas	Plant Saprotroph	0.511083	0.00144568	positive
Massilia	Plant Saprotroph	0.498359	0.00197922	positive
Cercospora	fermentation	-0.493179	0.0025219	negtive
Massilia	aromatic_compound_degradation	-0.484201	0.00276881	negtive
Allorhizobium_Neorhizobium_Pararhizobium_Rhizobium	fermentation	-0.459459	0.00523025	negtive
Microdochium	aromatic_compound_degradation	0.454831	0.00531983	positive
Xanthomonas	Plant Saprotroph	0.454458	0.00536218	positive
Fusarium	Plant Pathogen	0.453282	0.00593563	positive
Microdochium	Plant Saprotroph	-0.447801	0.00616908	negtive
Massilia	Wood Saprotroph	0.437995	0.00754674	positive
Leptospora	plant_pathogen	0.436406	0.00779309	positive
Dioszegia	nitrogen_fixation	0.433926	0.00819134	positive
Microdochium	Animal Pathogen	-0.428833	0.00906389	negtive
Dioszegia	Plant Pathogen	-0.42696	0.00940407	negtive
Fusarium	Endophyte	0.415701	0.0122641	positive
Cercospora	Wood Saprotroph	0.406692	0.0144396	positive
Microdochium	Wood Saprotroph	-0.406018	0.01401	negtive
Polaromonas	aromatic_compound_degradation	-0.405413	0.0141674	negtive
Leptospora	Animal Pathogen	0.389804	0.0187684	positive
Allorhizobium_Neorhizobium_Pararhizobium_Rhizobium	Plant Pathogen	0.387387	0.0202229	positive
Cladosporium	nitrogen_fixation	0.38121	0.0224423	positive
Allorhizobium_Neorhizobium_Pararhizobium_Rhizobium	aromatic_compound_degradation	-0.378378	0.0235256	negtive
Cladosporium	fermentation	-0.371686	0.0262613	negtive
Dioszegia	Plant Saprotroph	0.358337	0.0318745	positive
Xanthomonas	Undefined Saprotroph	0.352748	0.0348446	positive
Cladosporium	plant_pathogen	0.347233	0.0386058	positive
Microdochium	plant_pathogen	-0.345799	0.038849	negtive
Cercospora	Plant Pathogen	0.343629	0.0407736	positive
Fusarium	plant_pathogen	0.335907	0.0457546	positive
Allorhizobium_Neorhizobium_Pararhizobium_Rhizobium	Endophyte	0.331789	0.0486068	positive
Microdochium	fermentation	0.331075	0.0485676	positive
Polaromonas	Undefined Saprotroph	0.326804	0.0517249	positive
Polaromonas	fermentation	-0.321907	0.0555445	negtive
Leptospora	Plant Pathogen	0.318229	0.0585589	positive
Fusarium	Plant Saprotroph	0.31686	0.0601754	positive
Xanthomonas	nitrogen_fixation	0.314057	0.0621322	positive
Allorhizobium_Neorhizobium_Pararhizobium_Rhizobium	Plant Saprotroph	0.303732	0.0720792	positive
Cladosporium	Endophyte	0.27825	0.100437	positive
Cladosporium	Undefined Saprotroph	-0.270528	0.110538	negtive
Dioszegia	Wood Saprotroph	-0.266237	0.116525	negtive
Massilia	fermentation	-0.265397	0.117727	negtive
Dioszegia	aromatic_compound_degradation	-0.256563	0.130925	negtive
Leptospora	Plant Saprotroph	0.253862	0.135172	positive
Xanthomonas	Wood Saprotroph	0.251039	0.139718	positive
Polaromonas	Animal Pathogen	0.246392	0.147444	positive
Xanthomonas	Animal Pathogen	0.245733	0.148563	positive
Leptospora	aromatic_compound_degradation	-0.244078	0.151405	negtive
Fusarium	Undefined Saprotroph	-0.239382	0.159262	negtive
Polaromonas	plant_pathogen	0.235309	0.16712	positive
Polaromonas	Wood Saprotroph	0.225	0.187053	positive
Cercospora	aromatic_compound_degradation	0.211068	0.215749	positive
Cercospora	Plant Saprotroph	0.207979	0.222662	positive
Microdochium	Undefined Saprotroph	-0.202147	0.237074	negtive
Xanthomonas	Endophyte	-0.197467	0.248337	negtive
Massilia	Undefined Saprotroph	0.191003	0.264471	positive
Cercospora	plant_pathogen	0.187645	0.271996	positive
Cladosporium	aromatic_compound_degradation	-0.186358	0.275344	negtive
Polaromonas	Endophyte	-0.185309	0.279242	negtive
Fusarium	aromatic_compound_degradation	-0.178893	0.295298	negtive
Massilia	Endophyte	0.17337	0.311924	positive
Cercospora	Animal Pathogen	0.168855	0.323573	positive
Xanthomonas	fermentation	-0.167316	0.329379	negtive
Fusarium	nitrogen_fixation	0.140541	0.412142	positive
Xanthomonas	aromatic_compound_degradation	-0.138848	0.419316	negtive
Xanthomonas	Plant Pathogen	0.13833	0.421069	positive
Dioszegia	Animal Pathogen	-0.130281	0.448849	negtive
Xanthomonas	plant_pathogen	0.120602	0.483528	positive
Dioszegia	plant_pathogen	-0.117769	0.493936	negtive
Massilia	Plant Pathogen	0.0958878	0.578001	positive
Leptospora	Endophyte	0.0903708	0.600165	positive
Cercospora	nitrogen_fixation	0.0723295	0.674066	positive
Polaromonas	Plant Pathogen	-0.0695877	0.686742	negtive
Cercospora	Endophyte	-0.0694981	0.686175	negtive
Microdochium	Plant Pathogen	0.0657906	0.703036	positive
Cladosporium	Plant Saprotroph	-0.0643501	0.70839	negtive
Fusarium	fermentation	-0.0537967	0.754672	negtive
Cercospora	Undefined Saprotroph	-0.0435006	0.800663	negtive
Leptospora	Undefined Saprotroph	-0.0339856	0.844005	negtive
Dioszegia	fermentation	0.0194776	0.910227	positive
Microdochium	Endophyte	0.00955025	0.955915	positive
Allorhizobium_Neorhizobium_Pararhizobium_Rhizobium	Undefined Saprotroph	0.0030888	0.986256	positive

## Sheet: Table S5
Table S5 Source tracking analysis of the C. chinensis microbiome across the three host systems.
A. Bacterial source contributions
Schefflera heptaphylla						Pueraria montana						Humulus scandens
Group	EZCT1	EZCT2	EZCT3	EZCT4		Group	PLGT1	PLGT2	PLGT3	PLGT4		Group	LCHT1	LCHT2	LCHT3	LCHT4
EZCW	0.0233	0.0149	0.0256	0.0127		PLGW	0.0857	0.0526	0.0716	0.033		LCHW	0.1928	0.0905	0.1582	0.1357
EZCJ	0.7995	0.7715	0.7896	0.7706		PLGJ	0.4804	0.4505	0.59	0.4972		LCHJ	0.7181	0.7939	0.6622	0.4282
Unknown	0.1772	0.2136	0.1848	0.2167		Unknown	0.4339	0.4969	0.3384	0.4698		Unknown	0.0891	0.1156	0.1796	0.4361
B. Fungal source contributions
Schefflera heptaphylla						Pueraria montana						Humulus scandens
Group	EZCT1	EZCT2	EZCT3	EZCT4		Group	PLGT1	PLGT2	PLGT3	PLGT4		Group	LCHT1	LCHT2	LCHT3	LCHT4
EZCW	0.0061	0.068	0.0647	0.0241		PLGW	0.0832	0.0757	0.0289	0.0522		LCHW	0.0137	0.0039	0.0137	0.5421
EZCJ	0.9481	0.8028	0.8339	0.8697		PLGJ	0.7969	0.7873	0.8367	0.8148		LCHJ	0.8187	0.8637	0.7829	0.0036
Unknown	0.0458	0.1292	0.1014	0.1062		Unknown	0.1199	0.137	0.1344	0.133		Unknown	0.1676	0.1324	0.2034	0.4543

## Sheet: Table S6
Table S6 Source tracking analysis of the parasitized stem microbiome across the three host systems.
A. Bacterial source contributions
Schefflera heptaphylla						Pueraria montana						Humulus scandens
Group	EZCJ1	EZCJ2	EZCJ3	EZCJ4		Group	PLGJ1	PLGJ2	PLGJ3	PLGJ4		Group	LCHJ1	LCHJ2	LCHJ3	LCHJ4
EZCT	0.7362	0.7481	0.7304	0.7816		PLGW	0.1137	0.0835	0.1141	0.0214		LCHW	0.0418	0.0367	0.0295	0.046
EZCW	0.0842	0.044	0.0505	0.0374		PLGT	0.6164	0.7385	0.6963	0.8866		LCHT	0.8602	0.8149	0.7971	0.8215
Unknown	0.1796	0.2079	0.2191	0.181		Unknown	0.2699	0.178	0.1896	0.092		Unknown	0.098	0.1484	0.1734	0.1325
B. Fungal source contributions
Schefflera heptaphylla						Pueraria montana						Humulus scandens
Group	EZCJ1	EZCJ2	EZCJ3	EZCJ4		Group	PLGJ1	PLGJ2	PLGJ3	PLGJ4		Group	LCHJ1	LCHJ2	LCHJ3	LCHJ4
EZCT	0.7307	0.7497	0.7028	0.7379		PLGW	0.0231	0.0204	0.0158	0.0242		LCHW	0.0094	0.0185	0.0081	0.0401
EZCW	0.1581	0.1423	0.2157	0.1745		PLGT	0.6802	0.8285	0.771	0.7993		LCHT	0.9254	0.8907	0.9101	0.8364
Unknown	0.1112	0.108	0.0815	0.0876		Unknown	0.2967	0.1511	0.2132	0.1765		Unknown	0.0652	0.0908	0.0818	0.1235
